# Supplementary material for: Analysis of a new hydrochloride salt of the common pharmaceutical metformin
Source: Royal Society of Chemistry journal article supplement (doi:10.1039/d5ce00711a), 2025-01-01
Supplement: d5ce00711a1.pdf [file d5ce00711a1.pdf]

# Analysis of a New Hydrochloride Salt of the Common Pharmaceutical Metformin

## Electronic Supplementary information

Thomas J. Hitchings,<sup>a</sup> School Project Students,<sup>b</sup> Angela Shepherd,<sup>b</sup> Maria Alfredsson,<sup>a</sup> Paul J. Saines.<sup>a</sup>

<sup>a</sup> Chemistry and Forensic Science, School of Natural Sciences, Ingram Building, University of Kent, Canterbury, Kent, CT2 7NH, United Kingdom

<sup>b</sup> Simon Langton Girls' Grammar School, Canterbury, Kent, CT1 3EW, United Kingdom

A list of students from the Simon Langton Girls' Grammar School who were involved in this project are listed below. This list only includes the students who shared their consent for their name to be included. We also acknowledge those who did not share their consent to be named here.

Aishwarya Nanda Kumar Sugontei

Habeeba Waleed Saad

Mary Lyell

Tara Macartney

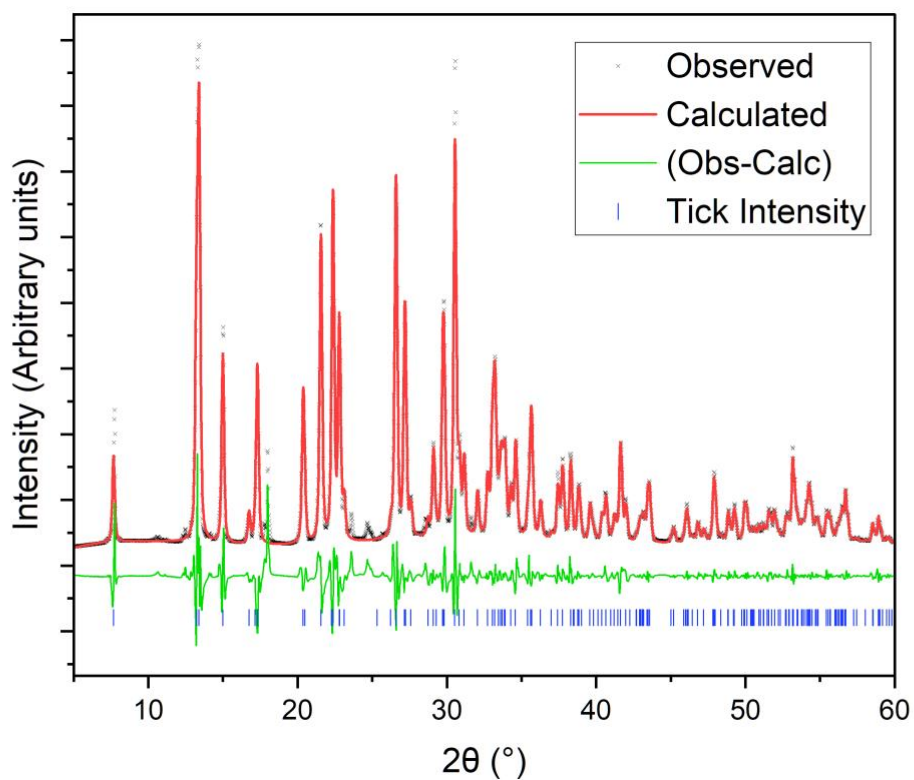

**Figure S1:** Powder X-ray diffraction pattern of metformin dihydrochloride fitted using the Le Bail method. The unfitted impurity peaks indicate the presence of a minor  $\alpha$ -metformin hydrochloride impurity. Refined unit cells of  $a = 7.1313(13) \text{ \AA}$ ,  $b = 5.8049(6) \text{ \AA}$ ,  $c = 12.553(3) \text{ \AA}$ ,  $\beta = 105.112(5)^\circ$ , with measures of fit  $wR_2 = 11.94\%$ ,  $R_1 = 7.38\%$  and  $\chi^2 = 6.55$ .

**Table S1:** Microanalysis results for the bulk metformin dihydrochloride sample

| Atom | $C_4H_{11}N_5(HCl)_2$ | $C_4H_{11}N_5(HCl)$ | Found average |
|------|-----------------------|---------------------|---------------|
| C    | 23.77%                | 29.01%              | 23.44%        |
| H    | 6.48%                 | 7.30%               | 6.31%         |
| N    | 34.66%                | 42.28%              | 33.73%        |

**Table S2:** Crystallographic details of reported structure

|                                               |                                                               |
|-----------------------------------------------|---------------------------------------------------------------|
| Empirical formula                             | C <sub>4</sub> H <sub>13</sub> Cl <sub>2</sub> N <sub>5</sub> |
| Formula weight                                | 202.09                                                        |
| Temperature/K                                 | 99.9(6)                                                       |
| Crystal system                                | monoclinic                                                    |
| Space group                                   | <i>P</i> 2 <sub>1</sub>                                       |
| <i>a</i> (Å)                                  | 7.0824(3)                                                     |
| <i>b</i> (Å)                                  | 5.7853(2)                                                     |
| <i>c</i> (Å)                                  | 12.4696(7)                                                    |
| β/°                                           | 105.262(5)                                                    |
| Volume/Å <sup>3</sup>                         | 492.90(4)                                                     |
| Z                                             | 2                                                             |
| ρ <sub>calc</sub> /g/cm <sup>3</sup>          | 1.362                                                         |
| μ/mm <sup>-1</sup>                            | 0.612                                                         |
| F(000)                                        | 212.0                                                         |
| Crystal size/mm <sup>3</sup>                  | 0.171 × 0.109 × 0.089                                         |
| Radiation                                     | Mo Kα (λ = 0.71073)                                           |
| 2θ range for data collection/°                | 7.596 to 59.476                                               |
| Index ranges                                  | -9 ≤ <i>h</i> ≤ 9, -7 ≤ <i>k</i> ≤ 8, -15 ≤ <i>l</i> ≤ 15     |
| Reflections collected                         | 6044                                                          |
| Independent reflections                       | 2364 [R <sub>int</sub> = 0.0365, R <sub>sigma</sub> = 0.0501] |
| Data/restraints/parameters                    | 2364/1/102                                                    |
| Goodness-of-fit on F <sup>2</sup>             | 1.065                                                         |
| Final R indexes [ <i>I</i> ≥ 2σ ( <i>I</i> )] | R <sub>1</sub> = 0.0325, wR <sub>2</sub> = 0.0700             |
| Final R indexes [all data]                    | R <sub>1</sub> = 0.0353, wR <sub>2</sub> = 0.0721             |
| Largest diff. peak/hole / e Å <sup>-3</sup>   | 0.35/-0.28                                                    |
| Flack parameter                               | 0.12(5)                                                       |

**Table S3:** Thermal expansion coefficients calculated using PASCAL.<sup>3</sup>

| Axes           | α (MK <sup>-1</sup> ) | <i>a</i> | <i>b</i> | <i>c</i> |
|----------------|-----------------------|----------|----------|----------|
| X <sub>1</sub> | 33.9(19)              | 0.8891   | 0.0      | -0.4577  |
| X <sub>2</sub> | 47(4)                 | 0.8569   | -0.0     | 0.5155   |
| X <sub>3</sub> | 20.6(10)              | -0.0     | 1.0      | 0.0      |
| V              | 102(6)                |          |          |          |

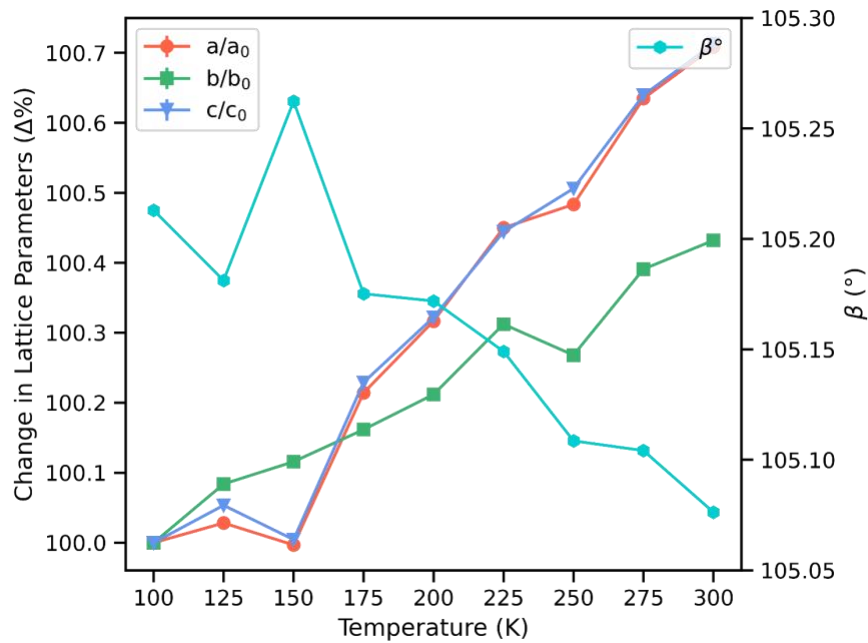

**Figure S2:** Evolution of lattice parameters for metformin dihydrochloride with temperature with reference to 100 K structure.

**Table S4:** Bond distances comparable across the metformin molecules in the monoprotic polymorphs and diprotic forms, all measured at 100 K. <sup>1,2</sup>

| Atom | Atom | Bond Length ( $\text{\AA}$ ) |                       |                    |
|------|------|------------------------------|-----------------------|--------------------|
|      |      | Dihydrochloride              | Monoprotic - $\alpha$ | Monoprotic $\beta$ |
| N1   | C1   | 1.318(4)                     | 1.3407(4)             | 1.346(2)           |
| N2   | C1   | 1.306(4)                     | 1.3398(3)             | 1.352(2)           |
| N3   | C1   | 1.365(4)                     | 1.3332(3)             | 1.328(2)           |
| N3   | C2   | 1.389(4)                     | 1.3545(4)             | 1.364(2)           |
| N4   | C2   | 1.306(4)                     | 1.3372(4)             | 1.334(2)           |
| N5   | C2   | 1.320(4)                     | 1.3376(4)             | 1.341(2)           |
| N5   | C3   | 1.462(4)                     | 1.4566(5)             | 1.460(2)           |
| N5   | C4   | 1.466(4)                     | 1.4590(4)             | 1.468(2)           |

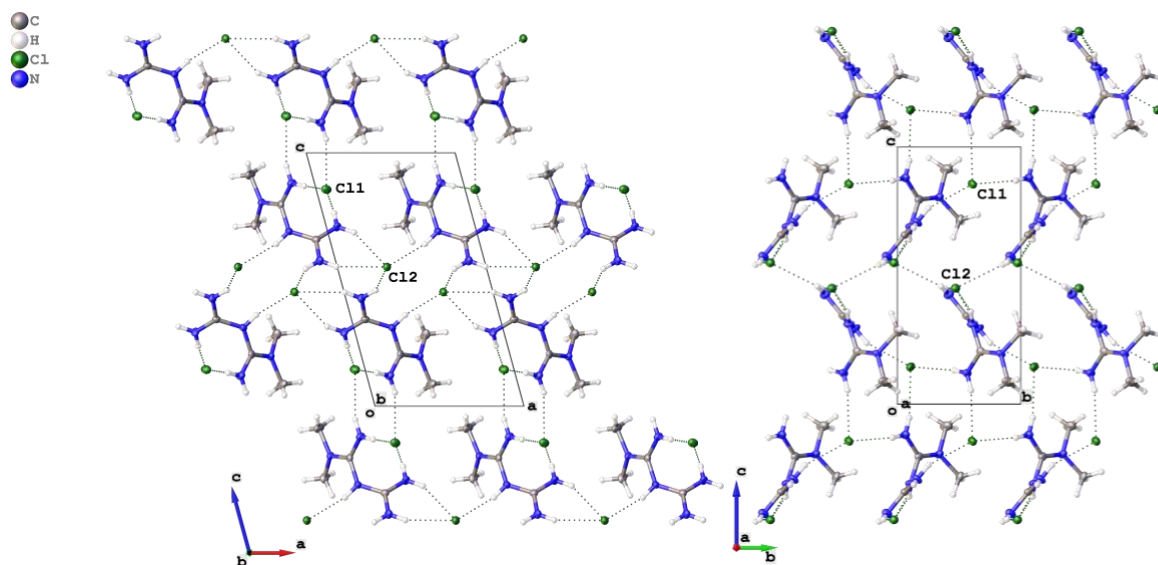

**Figure S3:** The packing of metformin dihydrochloride displayed along the *b*-axis (left) and the *a*-axis (right).

**Table S5:** Hydrogen bonding in metformin dihydrochloride at 100 K.

| Hydrogen Bond<br>(D-H...Cl) | Donor-Acceptor<br>distance (Å) | Hydrogen<br>bond angle (°) |
|-----------------------------|--------------------------------|----------------------------|
| N4-H4a...Cl1                | 3.135(2)                       | 161.46(14)                 |
| N4-H4b...Cl1                | 3.200(3)                       | 157.86(14)                 |
| N2-H2b...Cl1                | 3.180(2)                       | 158.21(16)                 |
| N1-H1a...Cl2                | 3.227(2)                       | 150.20(15)                 |
| N2-H2a...Cl2                | 3.233(2)                       | 150.02(15)                 |
| N1-H1b...Cl2                | 3.210(2)                       | 136.93(14)                 |
| N3-H3...Cl2                 | 3.058(2)                       | 161.94(16)                 |

**Table S6:** Analysis of the hydrogen bonding in metformin dihydrochloride compared to published structures in the Cambridge Structural Database (CSD).

| Distance                |           |         |                |              |      |      |           |      |      |
|-------------------------|-----------|---------|----------------|--------------|------|------|-----------|------|------|
| Donor                   | Acceptor  | D-A (Å) | Classification | Threshold    | Hits | Mean | Std. dev. | Min  | Max  |
| N3 (sec_amine_1)        | Cl2 (cl-) | 3.06    | Unusual        | (3.08, 3.42) | 437  | 3.23 | 0.11      | 3    | 3.73 |
| N2 (acyclic_prim_amine) | Cl2 (cl-) | 3.23    | Not Unusual    | (3.15, 3.45) | 374  | 3.28 | 0.09      | 3.07 | 3.7  |
| N1 (acyclic_prim_amine) | Cl2 (cl-) | 3.21    | Not Unusual    | (3.15, 3.45) | 374  | 3.28 | 0.09      | 3.07 | 3.7  |
| N4 (iminium)            | Cl1 (cl-) | 3.21    | Not Unusual    | (3.12, 3.35) | 251  | 3.22 | 0.08      | 3.03 | 3.7  |
| N4 (iminium)            | Cl1 (cl-) | 3.13    | Not Unusual    | (3.12, 3.35) | 251  | 3.22 | 0.08      | 3.03 | 3.7  |
| N1 (iminium)            | Cl2 (cl-) | 3.23    | Not Unusual    | (3.12, 3.35) | 251  | 3.22 | 0.08      | 3.03 | 3.7  |
| N2 (iminium)            | Cl1 (cl-) | 3.19    | Not Unusual    | (3.12, 3.35) | 251  | 3.22 | 0.08      | 3.03 | 3.7  |

| Angle                   |           |             |                |           |      |        |           |        |        |
|-------------------------|-----------|-------------|----------------|-----------|------|--------|-----------|--------|--------|
| Donor                   | Acceptor  | D-H...A (°) | Classification | Threshold | Hits | Mean   | Std. dev. | Min    | Max    |
| N3 (sec_amine_1)        | Cl2 (cl-) | 161.02      | Not Unusual    | 149.31    | 437  | 167.78 | 10.41     | 121.55 | 179.93 |
| N2 (acyclic_prim_amine) | Cl2 (cl-) | 150.34      | Not Unusual    | 146.47    | 374  | 166.67 | 10.74     | 125.08 | 178.65 |
| N1 (acyclic_prim_amine) | Cl2 (cl-) | 137.26      | Unusual        | 146.47    | 374  | 166.67 | 10.74     | 125.08 | 178.65 |
| N4 (iminium)            | Cl1 (cl-) | 159.56      | Not Unusual    | 144.29    | 251  | 166.22 | 11.27     | 125.62 | 179.97 |
| N4 (iminium)            | Cl1 (cl-) | 162.23      | Not Unusual    | 144.29    | 251  | 166.22 | 11.27     | 125.62 | 179.97 |
| N1 (iminium)            | Cl2 (cl-) | 150.57      | Not Unusual    | 144.29    | 251  | 166.22 | 11.27     | 125.62 | 179.97 |
| N2 (iminium)            | Cl1 (cl-) | 158.2       | Not Unusual    | 144.29    | 251  | 166.22 | 11.27     | 125.62 | 179.97 |

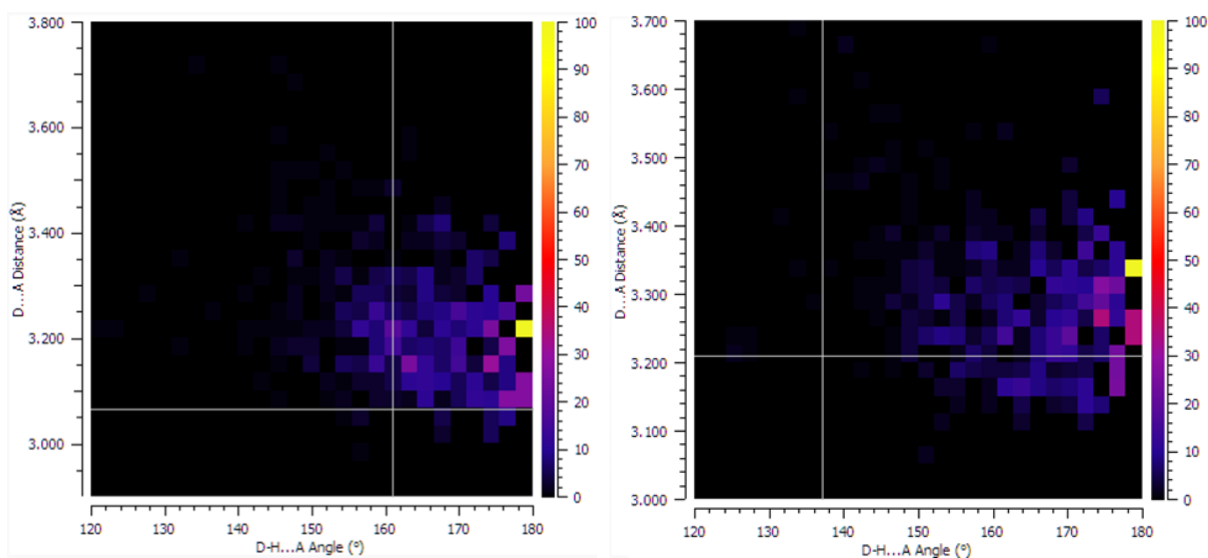

**Figure S4:** The distribution of distances and angles of hydrogen bond types from the CSD showing the context of the unusually short N3-H3...Cl2 (left) and nonlinear N1-H1b...Cl2 (right).

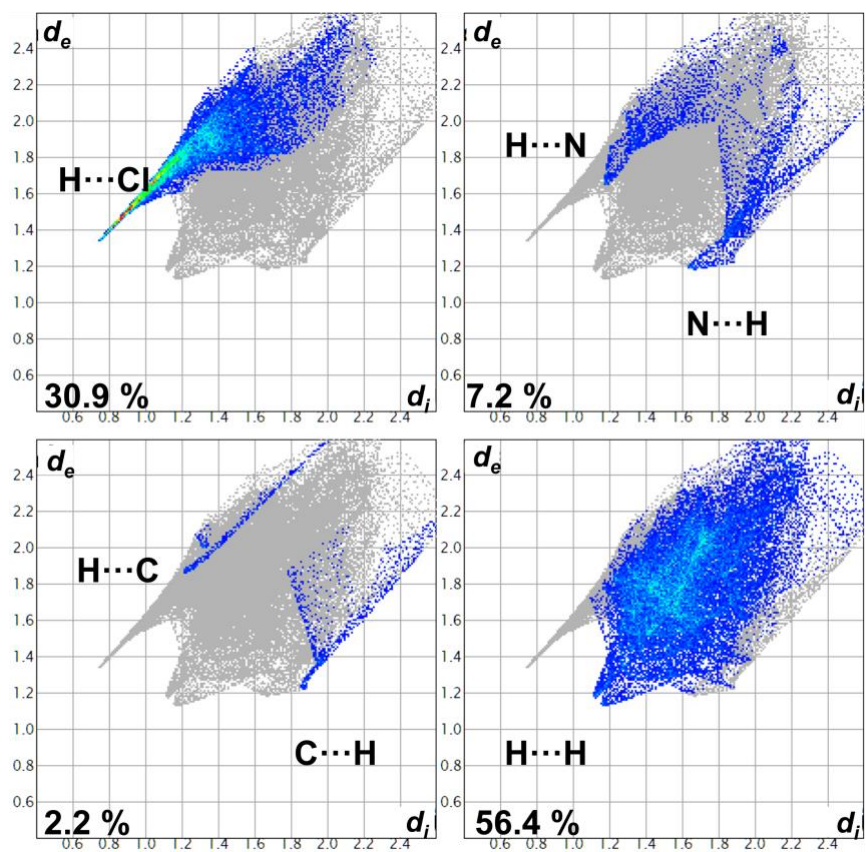

**Figure S5:** Filtered Hirschfeld analysis fingerprint plots for metformin dihydrochloride.

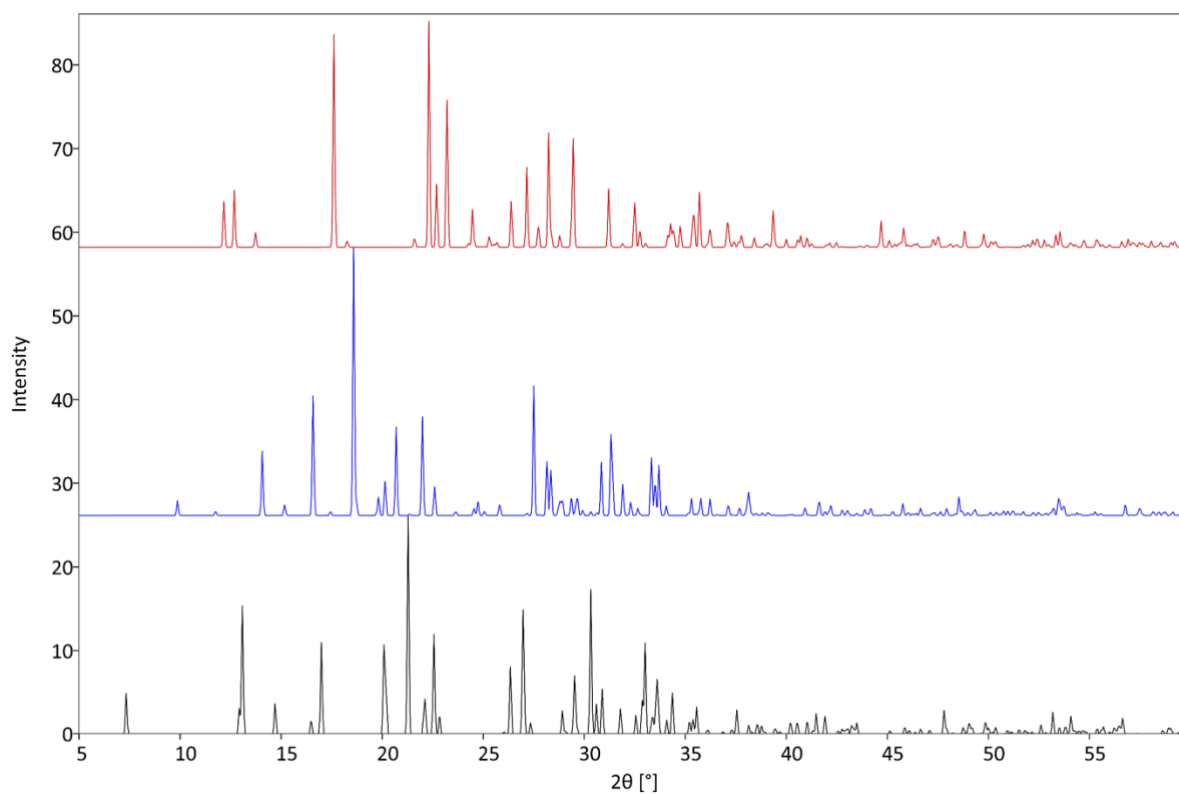

**Figure S6:** Simulated patterns for  $\alpha$ -metformin hydrochloride (red),  $\beta$ -metformin hydrochloride (blue) and metformin dihydrochloride (black), showing these phases are distinguishable by powder diffraction, with minimal peak overlap between systems.

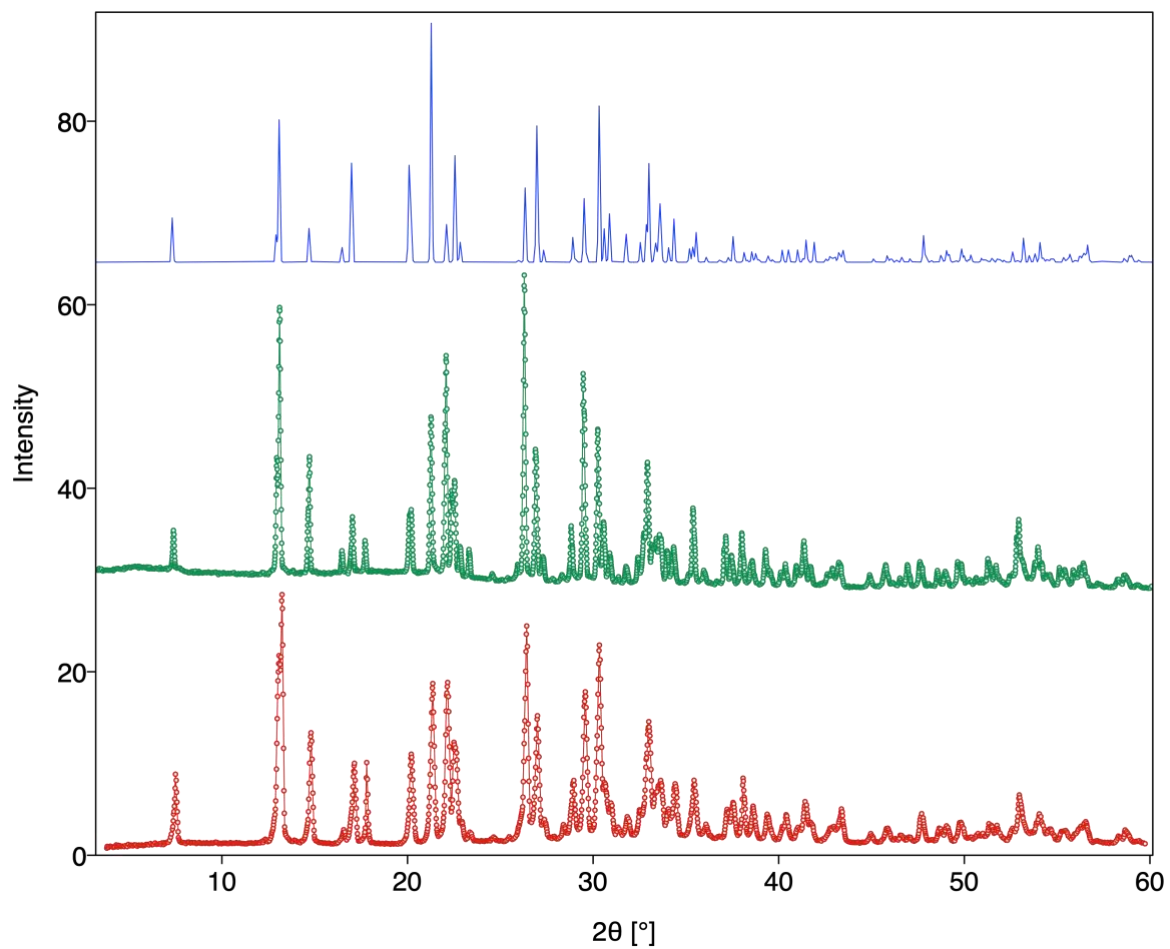

**Figure S7:** Diffraction patterns of freshly synthesised  $\alpha$ -metformin hydrochloride (red) and the same sample after aging for two years (green). A pattern calculated from the structure determined during this study is shown above in blue for reference.

## Dichloride Salt

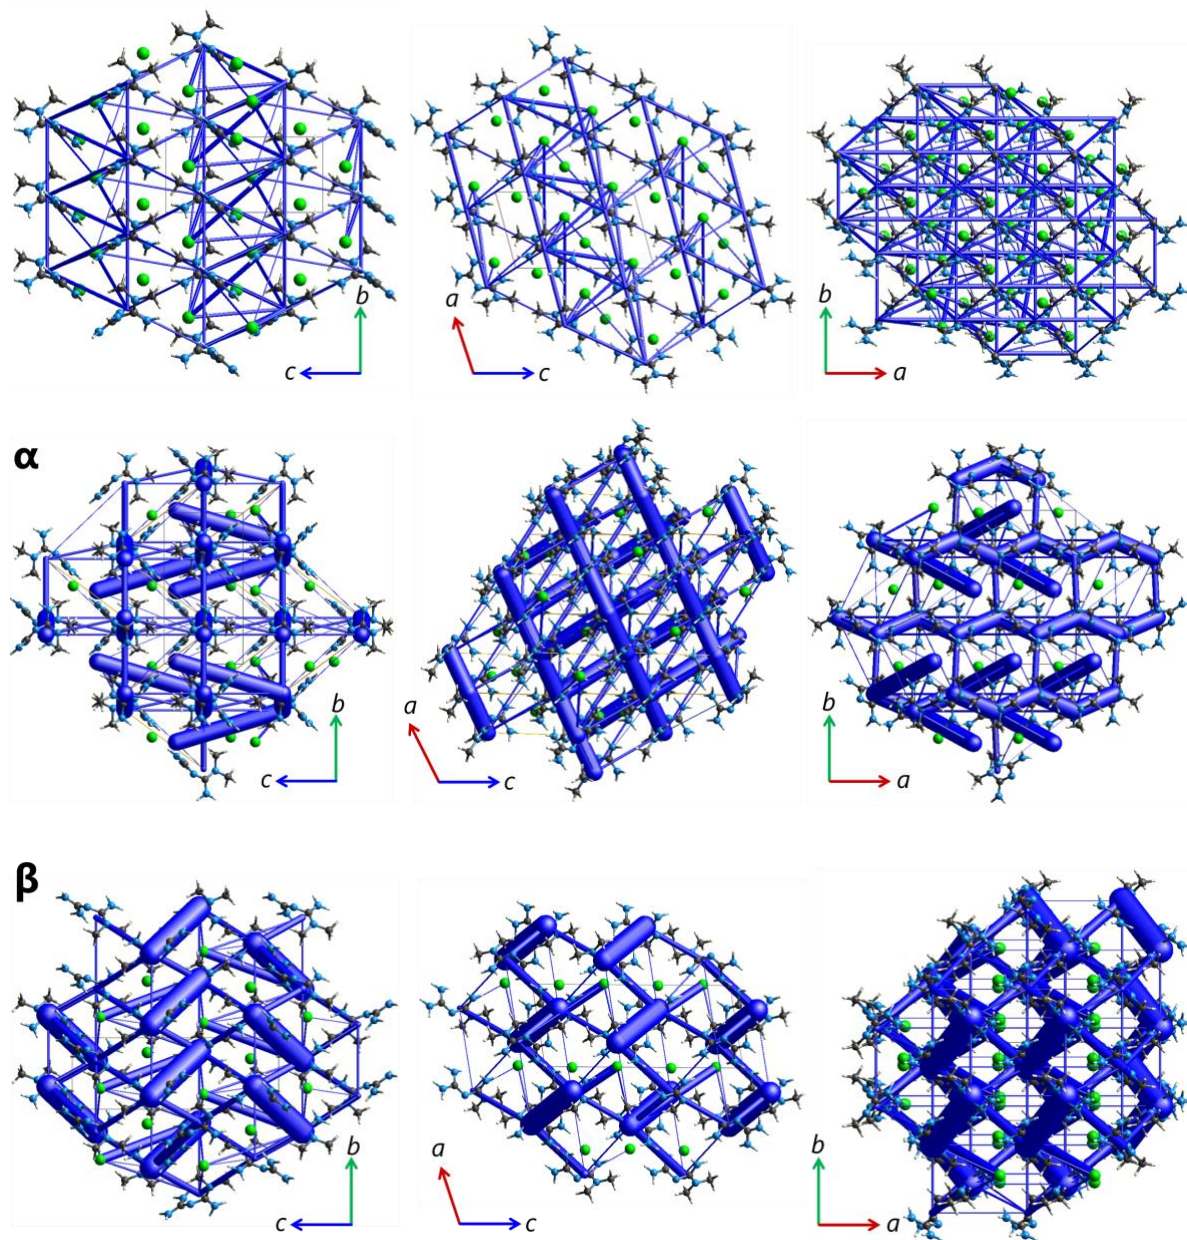

**Figure S8:** Total energy frameworks visualised as blue cylinders with the thickness indicative of the strength of interaction between centroids of molecular pairs.

## References

- 1 S. L. Childs, L. J. Chyall, J. T. Dunlap, D. A. Coates, B. C. Stahly and G. P. Stahly, *Cryst. Growth Des.*, 2004, **4**, 441–449.
- 2 R. N. Devi, C. Jelsch, S. Israel, E. Aubert, C. Anzline and A. A. Hosamani, *Acta Crystallogr. Sect. B Struct. Sci. Cryst. Eng. Mater.*, 2017, **73**, 10–22.
- 3 M. Lertkiattrakul, M. L. Evans and M. J. Cliffe, *J. Open Source Softw.*, 2023, **8**, 5556.
- 4 X. Sun, S. Du, Y. Sun, H. Li, C. P. Yu, J. Guo, Y. Wang, S. Yu, Y. Cheng and F. Xue, *J. Chem. Eng. Data*, 2021, **66**, 3282–3292.
